# Supplementary material for: Influence of the sensitizer reduction potential on the sensitivity of photorefractive polymer composites
Source: Royal Society of Chemistry journal article supplement (doi:10.1039/c0jm01208d), 2010-01-01
Supplement: c0jm01208d.pdf [file c0jm01208d.pdf]

## Supporting Information

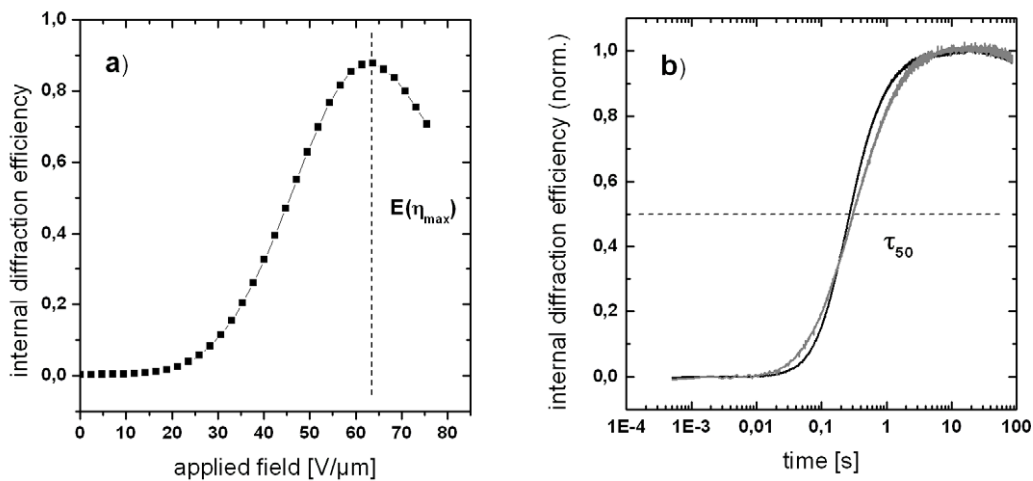

Figure S1.

5 Determination of  $E(\eta_{\max})$  and  $\tau_{50}$  from holographic measurements of PF6-TPD/[60]PCBM.

a) Steady-state data, internal diffraction efficiency plotted versus the external applied field. Vertical line indicates applied field necessary to reach over-modulation of diffraction efficiency  $E(\eta_{\max})$ .

b) Normalized dynamic internal diffraction efficiency for non-pre-illuminated (black line) and pre-illuminated (grey line) PPC at an applied field of 56.6 V/μm, the horizontal line indicates  $\tau_{50}$ .

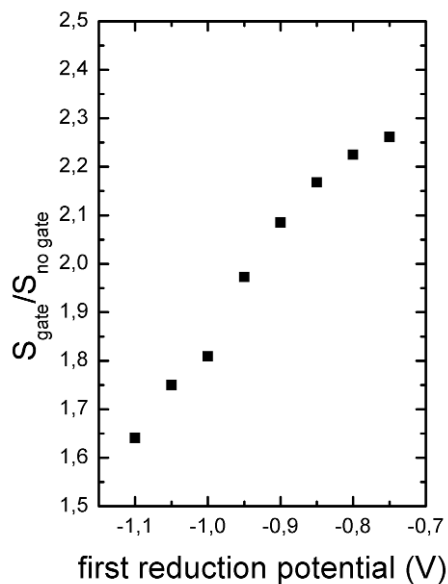

Figure S2.

Ratio of Sensitivity upon pre-illumination  $S_{\text{gate}}$  and without pre-illumination  $S_{\text{no gate}}$  according to Fig.2b.
